# Supplementary material for: Analysis of Extended Spectrum Beta Lactamase (ESBL) Genes of Non-Invasive ESBL Enterobacterales in Southeast Austria in 2017
Source: MDPI journal article supplement (doi:10.3390/antibiotics12010001), 2022-12-20
Supplement: s1 [file s1]

**Table S1.** Abundance of non-ESBL phenotype bla genes.

|                      | <i>bla</i> <sub>TEM-1</sub> | <i>bla</i> <sub>SHV-1</sub> | <i>bla</i> <sub>SHV-11</sub> | <i>bla</i> <sub>SHV-28</sub> | <i>bla</i> <sub>SHV-76</sub> |
|----------------------|-----------------------------|-----------------------------|------------------------------|------------------------------|------------------------------|
| <i>E. coli</i>       | 146                         | 1                           | 1                            | -                            | -                            |
| <i>K. pneumoniae</i> | 40                          | 28                          | 12                           | 1                            | 6                            |
| <i>P. mirabilis</i>  | 5                           | -                           | -                            | -                            | -                            |
| <i>E. cloacae</i>    | 4                           | -                           | -                            | -                            | -                            |
| <i>K. oxytoca</i>    | 5                           | -                           | -                            | -                            | -                            |
| <i>C. braakii</i>    | 1                           | -                           | -                            | -                            | -                            |
| <i>C. freundii</i>   | 1                           | -                           | -                            | -                            | -                            |
| <i>S. spp</i>        | 1                           | -                           | -                            | -                            | -                            |
| <i>sum</i>           | 203                         | 29                          | 13                           | 1                            | 6                            |

**Table S2.** Isolates with ESBL phenotype but no detected ESBL genes.

| <i>Isolates</i>             | non-ESBL genes                                             | AM | AMC | CXM | CTX | GM | TZP | CIP | SXT | MEM | FEP | CAZ |
|-----------------------------|------------------------------------------------------------|----|-----|-----|-----|----|-----|-----|-----|-----|-----|-----|
| <i>K. pneumoniae</i>        | <i>bla</i> <sub>SHV-1</sub>                                | R  | S   | R   | R   | S  | S   | S   | R   | S   | S   | R   |
| <i>E. coli</i>              | -                                                          | R  | S   | R   | R   | S  | S   | S   | S   | S   | S   | S   |
| <i>Providencia rettgeri</i> | -                                                          | R  | R   | R   | R   | R  | S   | R   | R   | S   | R   | R   |
| <i>E. coli</i>              | -                                                          | R  | R   | R   | R   | R  | R   | R   | R   | S   | R   | R   |
| <i>E. coli</i>              | <i>bla</i> <sub>TEM-1</sub> , <i>bla</i> <sub>SHV-11</sub> | R  | R   | R   | R   | S  | R   | R   | R   | S   | R   | R   |
| <i>K. variicola</i>         | <i>bla</i> <sub>SHV-11</sub>                               | R  | R   | R   | R   | S  | R   | S   | S   | S   | R   | R   |
| <i>K. oxytoca</i>           | -                                                          | R  | R   | R   | R   | S  | R   | S   | S   | S   | R   | R   |
| <i>C. freundii</i>          | <i>bla</i> <sub>TEM-1</sub>                                | R  | R   | S   | -   | S  | S   | S   | S   | R   | S   | S   |
